# Supplementary material for: Conjugated branch modulated optical characteristics of multibranched push–pull molecules composed of quinoxaline and triphenylamine groups: transition of the conjugated branch from unusual effects to usual effects
Source: Royal Society of Chemistry journal article supplement (doi:10.1039/d2tc02606f), 2022-01-01
Supplement: d2tc02606f1.pdf [file d2tc02606f1.pdf]

## **Supporting Information**

### Note S1. Stokes shift fitting method.

The Stokes shift of QTPA1 and QTPA2 as a function of polarity of solvent is given in Figure 1(C), which is fitted by linear function of

$$\Delta\bar{\nu}(v_{abs}^- - v_{em}^-) = \frac{2\Delta\mu^2\Delta f}{hca^3} + const$$
$$\Delta f = \frac{\varepsilon - 1}{2\varepsilon + 1} - \frac{n^2 - 1}{2n^2 + 1}$$

where  $\varepsilon$  and  $n$  are the dielectric constant and the refractive index of the solvents, respectively;  $\nu_a$  ( $\nu_f$ ) is the wavenumber ( $\text{cm}^{-1}$ ) of the absorption (emission) maximum,  $h$  ( $6.6\times 10^{-34}$  J·s) is the Planck constant,  $c$  ( $3.00\times 10^8$  m·s $^{-1}$ ) is the light velocity,  $\varepsilon_0$  ( $8.85\times 10^{-12}$  C·V $^{-1}$ ·m $^{-1}$ ) is the vacuum permittivity and  $\Delta\mu$  ( $=\mu_e-\mu_g$ ) is the dipole moment difference of the solute between  $S_0$  and  $S_1$  state.

### Note S2. Calculation Details of nonlinear absorption coefficient ( $\beta$ ) and the two-photon absorption cross section ( $\sigma$ ).

The influence of the solvent nonlinearity could be excluded. The two-photon absorption (TPA) coefficient  $\beta$  of TOND in three solvents can be obtained by fitting the experimental results with equation:

$$T(z, S = 1) = \sum_{m=0}^{\infty} \frac{(-q_0(z, 0))^m}{(m+1)^{3/2}}$$

where  $q_0(z) = \beta I_0 / (1 + z^2/z_0^2)$ ;  $z_0 = k\omega^2/2$  is the Rayleigh length,  $k = 2\pi/\lambda$  is the wave vector;  $\omega_0$  is beam waist radius of Gaussian pulse, and  $I_0$  is the pulse irradiance.

The TPA coefficient  $\beta$  is related to the TPA cross section  $\sigma$  by using

$$\sigma = \frac{\beta h\nu 10^3}{Nc}$$

where  $N$  is Avogadro's number,  $c$  is the concentration,  $h$  is Planck's constant, and  $\nu$  is the laser frequency. In this experiment, the concentration of QTPA is  $5\times 10^{-4}$  M.  $\sigma$  is expressed in Göppert-Mayer units (GM), with  $1 \text{ GM} = 1\times 10^{-50} \text{ cm}^4 \text{ s molecule}^{-1}$

photon<sup>-1</sup>.

### Note S3. Calculation Details of Temperature-Dependent PL Quantum Yield.

The PL quantum yield can be defined as the ratio of the number of emitted photons to the number of absorbed photons by a luminescent material:

$$PLQY = \frac{N_{em}}{N_{abs}}$$

The most straightforward method for the determination of PLQY values presents the absolute measurement of  $N_{abs}$  and  $N_{em}$  with an integrating sphere setup. The PLQY of QTPA1 and QTPA2 film at room temperature can be described by:

$$PLQY = \frac{\int \frac{\lambda}{hc} (I_{em}^{sample}(\lambda) - I_{em}(\lambda)) d\lambda}{\int \frac{\lambda}{hc} (I_{ex}(\lambda) - I_{ex}^{sample}(\lambda)) d\lambda}$$

and  $\lambda$  is the wavelength;  $h$  is Planck's constant;  $c$  is the velocity of light;  $I_{ex}^{sample}$  and  $I_{ex}$  are the integrated intensities of the excitation light with and without a sample, respectively.

After obtaining the temperature-dependent absorption and PL spectra of the sample, the quantum yield at different temperatures  $QY_2$  can be obtained from  $QY_1$ . The general equation used in the determination of relative quantum yields is given in

$$\frac{QY_2}{QY_1} = \frac{I_{em2}}{I_{em1}} \times \frac{A_1}{A_2} \times \frac{\lambda_{ex1}}{\lambda_{ex2}} \times \frac{\eta_2}{\eta_1}$$

Among them,  $I_{em}$  is the integrated area under the corrected emission spectrum;  $A$  is absorbance at the excitation wavelength;  $\lambda_{ex}$  is the excitation wavelength;  $\eta$  is the collection efficiency of the system. In our experiments, the system and test conditions are unchanged, which means that  $\eta_2/\eta_1 \approx 1$ , and the excitation wavelength remains the same.

### Note S4. Calculation Details of the Radiative Lifetime.

The PL decay can be described by:

$$I_{PL}(t) = \sum_{i=1}^n k_i \exp\left(-t/\tau_X^i\right),$$

where  $\tau_X^i$  is the effective single-exciton lifetime given by

$$\tau_X^i = \tau_{r,X} \tau_{nr,X}^i / (\tau_{r,X} + \tau_{nr,X}^i),$$

and  $k_i$  is the relative fraction of the QDs in the  $i$ -th sub-ensemble; the  $k_i$  coefficients are

normalized such as  $\sum_{i=1}^n k_i = 1$ . The PL quantum yield (QY) of the individual sub-ensemble is given by:

$$q_i = \tau_X^i / \tau_{r,X},$$

And the total PL QY of the entire QD sample ( $Q$ ) can be expressed as:

$$Q = \sum_{i=1}^n k_i q_i = \tau_{r,X}^{-1} \sum_{i=1}^n k_i \tau_X^i,$$

This leads to the following expression for the radiative lifetime:

$$\tau_{r,X} = Q^{-1} \sum_{i=1}^n k_i \tau_X^i = Q^{-1} \langle \tau_X \rangle,$$

Where  $\langle \tau_X \rangle$ , is the average exciton lifetime in the QD ensemble expressed as:

$$\langle \tau_X \rangle = \sum_{i=1}^n k_i \tau_X^i$$

|                   | QTPA1    |         | QTPA2    |         |
|-------------------|----------|---------|----------|---------|
|                   | abs (nm) | PL (nm) | abs (nm) | PL (nm) |
| CHX               | 413      | 484     | 414      | 483     |
| TOL               | 422      | 508     | 422      | 506     |
| o-dichlorobenzene | 425      | 541     | 425      | 555     |
| DCM               | 429      | 555     | 430      | 566     |
| THF               | 430      | 573     | 431      | 586     |
| TCM               | 431      | 581     | 432      | 607     |
| EToH              | 432      | 609     | 433      | 617     |
| ACE               | 433      | 623     | 434      | 623     |
| DMF               | 435      | 631     | 436      | 642     |
| DMSO              | 438      | 643     | 438      | 658     |

**Table S1.** The relevant data of solution absorption and photoluminescence emission spectra of QTPA1 and QTPA2.

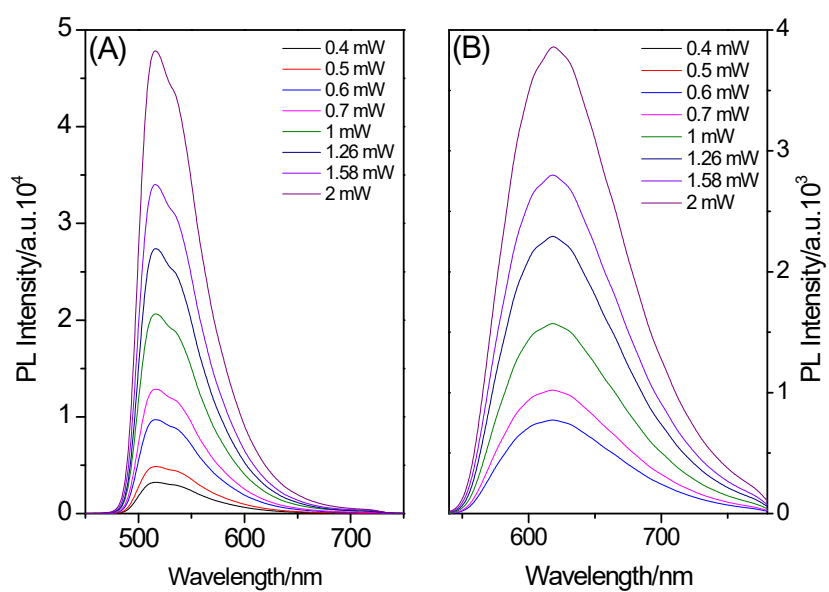

Figure S1. Two-photon fluorescence (TPF) spectra of QTPA1 in TOL (A) and DMF (B).

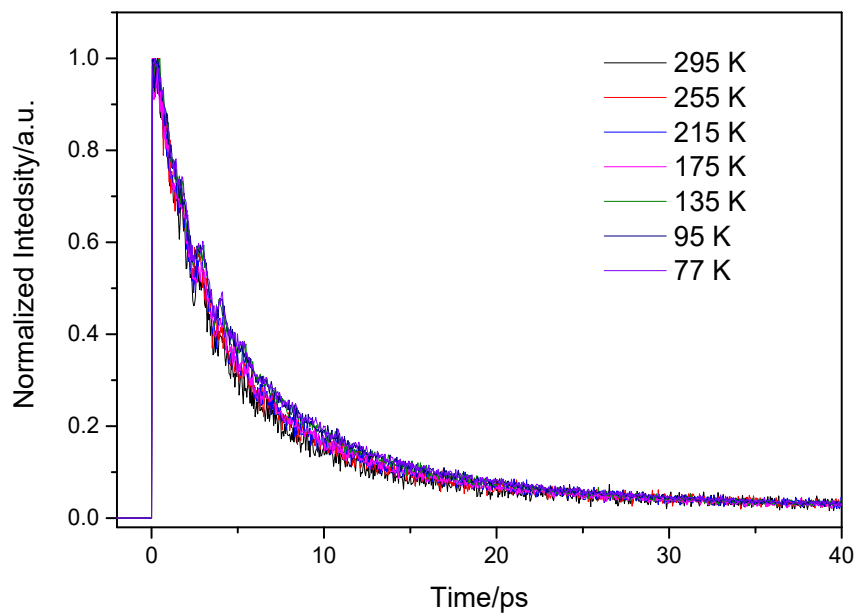

Figure S2. Temperature-dependent fluorescence lifetime of QTPA2.
